# Supplementary material for: Profiling of Nutritionally Vital Bioactive Compounds in Emerging Green Leafy Vegetables: A Comparative Study
Source: MDPI journal article supplement (doi:10.3390/foods11233867), 2022-11-30

**Figure S1.** Outline of the Method Used for Extraction of Crude Lipids

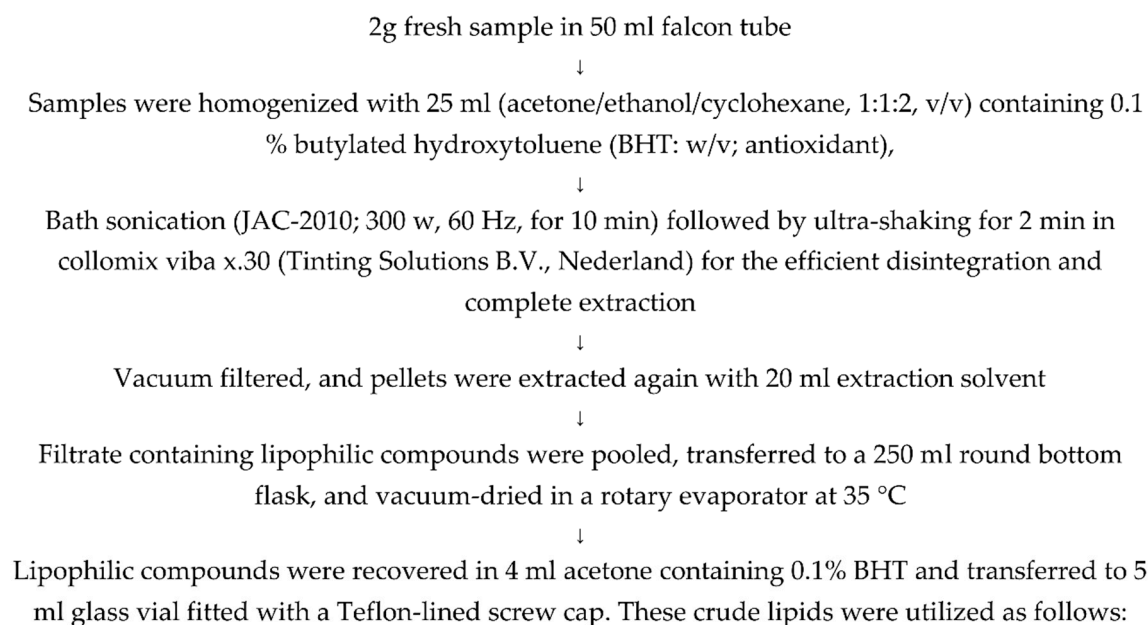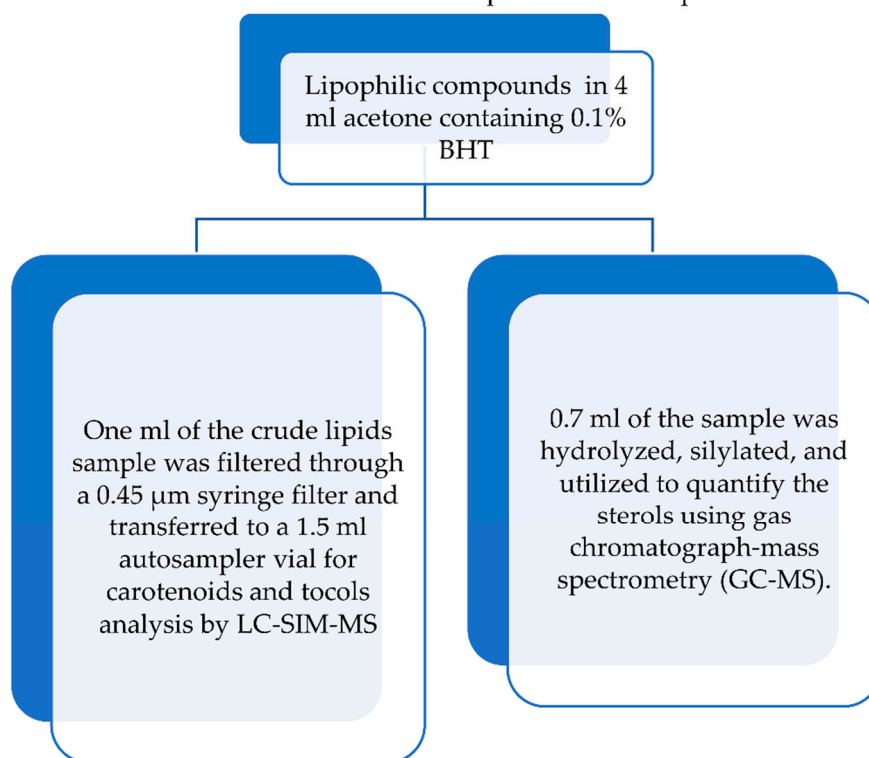

**Figure S2.** Outline of Methods Used for the Hydrolysis and Silylation of Sterols for GC-MS

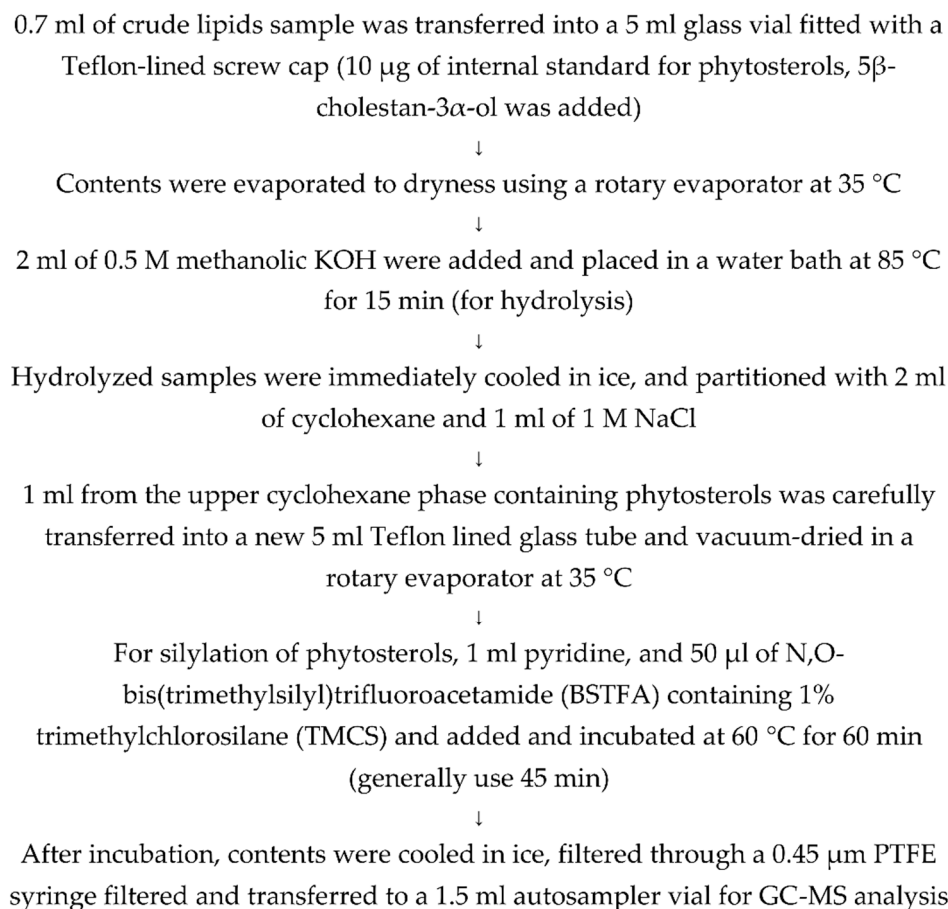

**Table S1.** Method analytical and validation parameters for LC-SIM-MS analysis of carotenoids and tocopherols.

| Compounds                      | Retention Time Precision |                              | Working                       | Limits                      |       | Correlatio                      | Area counts precision     |                            |
|--------------------------------|--------------------------|------------------------------|-------------------------------|-----------------------------|-------|---------------------------------|---------------------------|----------------------------|
|                                |                          |                              | Range<br>( $\mu\text{g/mL}$ ) |                             |       | n<br>coefficient<br>t ( $R^2$ ) |                           |                            |
| Compounds                      | Intra-day CV (%<br>n=6)  | Inter-day CV (%<br>n = 6 x2) | LOQ<br>( $\mu\text{g/mL}$ )   | LOD<br>( $\mu\text{g/mL}$ ) |       |                                 | Intra-day CV (%<br>n = 6) | Inter-day CV (%<br>= 6 x2) |
| (all-E)-<br>violaxanthin       | 0.08                     | 0.17                         | 5-50                          | 0.05                        | 0.015 | 1.000                           | 4.13                      | 5.33                       |
| 9-Z-neoxanthin                 | 0.10                     | 0.18                         | 5-50                          | 0.135                       | 0.045 | 0.999                           | 7.08                      | 7.39                       |
| (all-E)-<br>lactucaxanthin     | 0.07                     | 0.16                         | 5-50                          | 0.36                        | 0.12  | 1.000                           | 4.67                      | 5.41                       |
| (all-E)-lutein                 | 0.06                     | 0.15                         | 5-50                          | 0.075                       | 0.025 | 1.000                           | 2.49                      | 4.96                       |
| (all-E)-<br>zeaxanthin         | 0.10                     | 0.15                         | 5-50                          | 0.135                       | 0.045 | 1.000                           | 5.17                      | 7.10                       |
| (all-E)- $\beta$ -<br>carotene | 0.08                     | 0.16                         | 5-50                          | 0.39                        | 0.13  | 1.000                           | 4.95                      | 6.09                       |
| $\alpha$ -tocopherol           | 0.21                     | 0.32                         | 10-100                        | 1.57                        | 0.52  | 0.999                           | 8.91                      | 9.25                       |

CV, coefficient of variation; LOD, limits of detection; LOQ, limits of quantitation

**Table S2.** Method analytical and validation parameters for GC-MS analysis of sterols.

| Sterols               | Retention Time Precision |                               | Working Range<br>( $\mu\text{g/mL}$ ) | Limits                      |                             | Correlation coefficient ( $R^2$ ) | Area counts Precision      |                               |
|-----------------------|--------------------------|-------------------------------|---------------------------------------|-----------------------------|-----------------------------|-----------------------------------|----------------------------|-------------------------------|
|                       | Intra-day CV<br>(%, n=6) | Inter-day CV (%,<br>n = 6 x2) |                                       | LOQ<br>( $\mu\text{g/mL}$ ) | LOD<br>( $\mu\text{g/mL}$ ) |                                   | Intra-day CV<br>(%, n = 6) | Inter-day CV (%,<br>n = 6 x2) |
| Campesterol           | 0.02                     | 0.03                          | 5-50                                  | 1.42                        | 0.47                        | 1.000                             | 2.21                       | 4.38                          |
| Stigmasterol          | 0.03                     | 0.05                          | 5-50                                  | 2.43                        | 0.81                        | 0.999                             | 2.44                       | 4.58                          |
| $\beta$ -Sitosterol   | 0.03                     | 0.04                          | 5-50                                  | 2.90                        | 0.97                        | 0.998                             | 2.34                       | 6.16                          |
| $\alpha$ -Spinasterol | 0.02                     | 0.07                          | 5-50                                  | 3.71                        | 1.24                        | 0.991                             | 2.08                       | 4.78                          |

CV, coefficient of variation; LOD, limits of detection; LOQ, limits of quantitation

**Figure S3:** A characteristic mass fragmentation pattern of  $\beta$ -Sitosterol (trimethylsiloxy (TMS) derivative) observed in the present investigation.

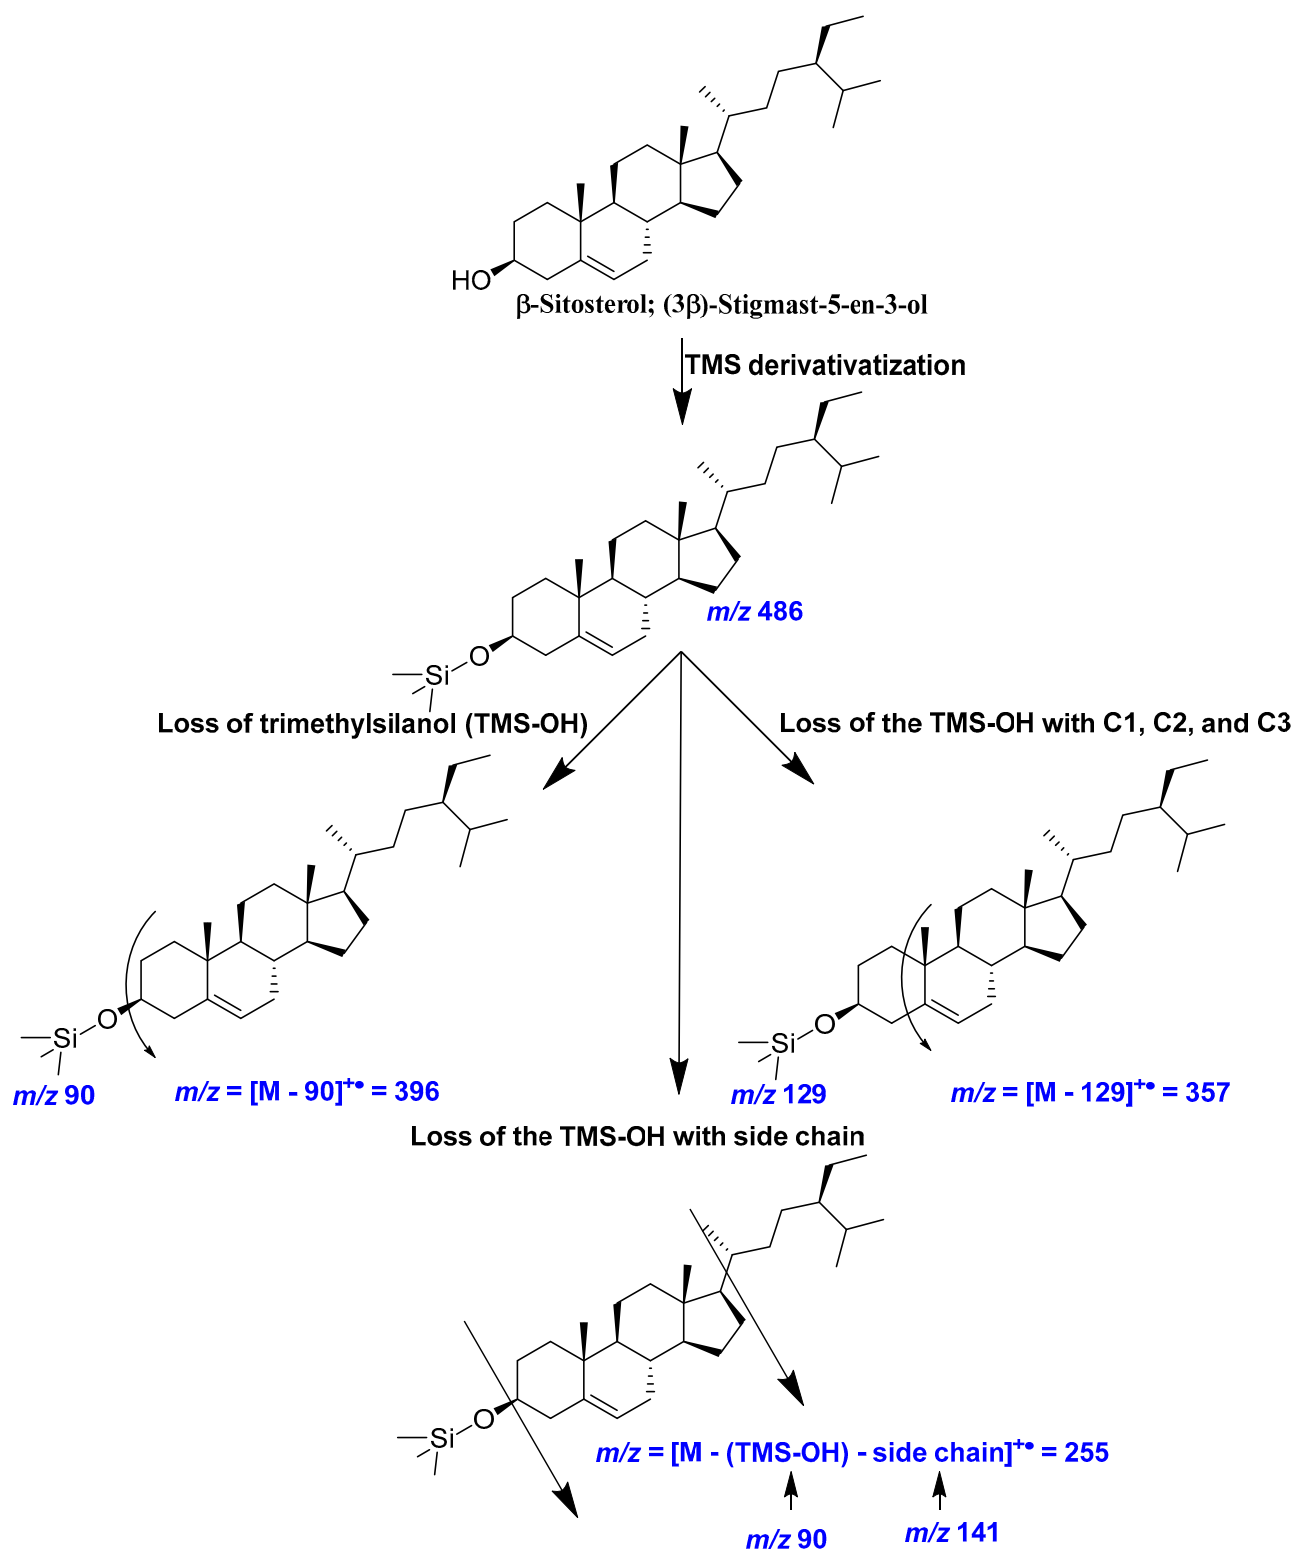

**Figure S4:** The characteristic GC-MS-fragmentation pattern of phytosterols identified in studied GLVs.

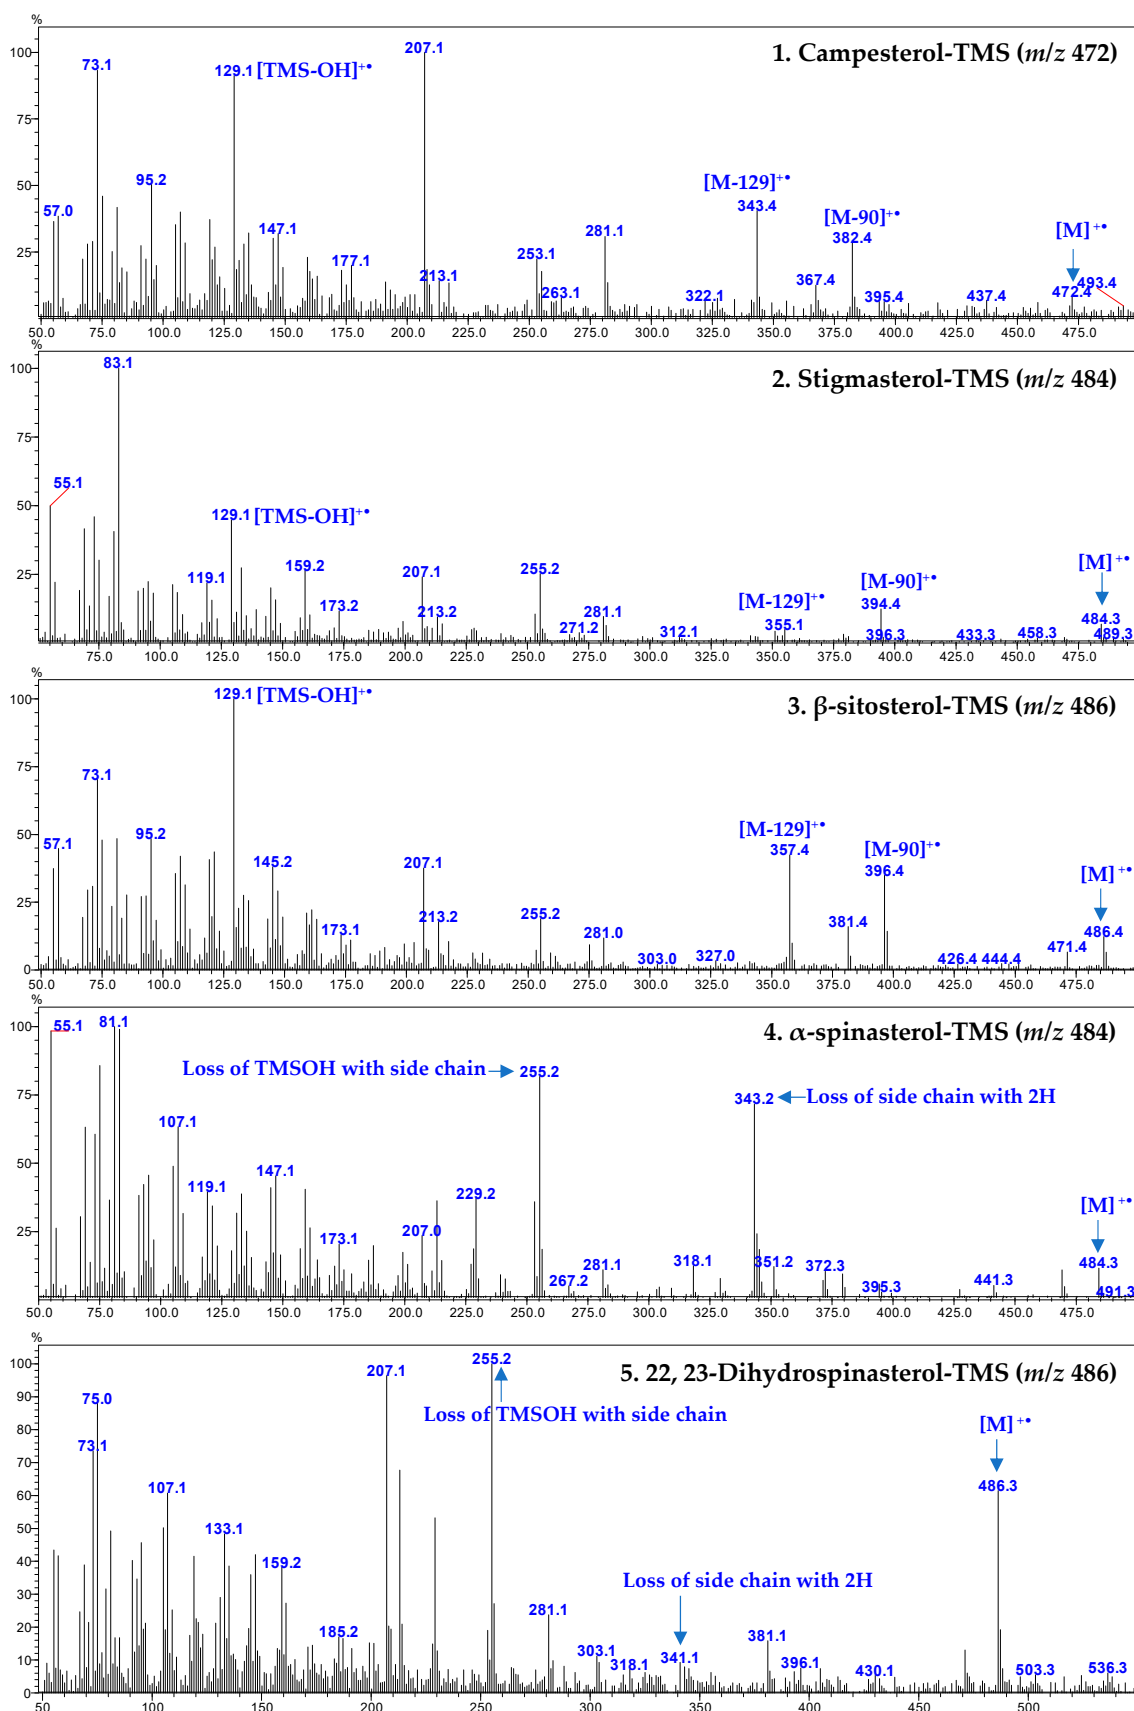

Supplement: s1 [file s1]
